# Supplementary material
Source: MDPI journal article supplement (https://www.mdpi.com/2225-1146/9/2/23)
Supplement: s1 [file s1]

Archive with 1 entries (1 files):
- econometrics-1002400-supplementary.pdf
